# Supplementary material for: Whole-Genome Characterization of Epidemic Neisseria meningitidis Serogroup C and Resurgence of Serogroup W, Niger, 2015
Source: PubMed Central journal article supplement (PMC5038424; doi:10.3201/eid2210.160468), 2016-10
Supplement: 16-0468-Techapp-s1.pdf [file 16-0468-Techapp-s1.pdf]

# Whole-Genome Characterization of Epidemic *Neisseria meningitidis* Serogroup C and Resurging Serogroup W, Niger, 2015

## Technical Appendix

**Technical Appendix Table 1.** Details regarding 102 *Neisseria meningitidis* isolates from the Centre de Recherche Médicale et sanitaire (Niamey, Niger) that were confirmed at World Health Organization Collaborating Centres for Meningitis. An additional 30 NmC isolates from 20 countries and 94 NmW isolates from 15 countries, representing the diversity of the 2 serogroups in the CDC culture collection, were selected and sequenced to compare with the Niger isolates.

| Niger ID | Lab_ID | sAsG | PCR sG | Year | Country | District      | ST*   | CC*                        | PorA†       | PorB† | FetA† | NadA§       | NhbA¶  | FHbp# | gyrA¶  |         | penA¶  |         | rpoB¶  |         | PubMLST ID |
|----------|--------|------|--------|------|---------|---------------|-------|----------------------------|-------------|-------|-------|-------------|--------|-------|--------|---------|--------|---------|--------|---------|------------|
|          |        |      |        |      |         |               |       |                            |             |       |       |             |        |       | allele | meaning | allele | meaning | allele | meaning |            |
| 19-15    | M37531 | C    | NmC    | 2015 | Niger   | DOGONDOuTCHI  | 10217 | Unassigned<br>CC for 10217 | P1.21-15,16 | 3-463 | 1-7   | Not present | P00798 | A106  | 2      | Sus     | 22     | Sus     | 1      | Sus     | 39587      |
| 82-15    | M37609 | W    | NmW    | 2015 | Niger   | KOLLO         | 11    | CC11/ET-37                 | P1.5,2      | 2-2   | 1-1   | NadA-2/3.6‡ | p0096  | B45   | 4      | Sus     | 1      | Sus     | 9      | Sus     | 39628      |
| 83-15    | M37610 | W    | NmW    | 2015 | Niger   | KOLLO         | 11    | CC11/ET-37                 | P1.5,2      | 2-2   | 1-1   | NadA-2/3.6  | p0096  | B45   | 4      | Sus     | 1      | Sus     | 9      | Sus     | 39629      |
| 111-15   | M37611 | W    | NmW    | 2015 | Niger   | KOLLO         | 11    | CC11/ET-37                 | P1.5,2      | 2-2   | 1-1   | NadA-2/3.6  | p0096  | B45   | 4      | Sus     | 1      | Sus     | 9      | Sus     | 39630      |
| 126-15   | M37532 | C    | NmC    | 2015 | Niger   | DOGONDOuTCHI  | 10217 | Unassigned<br>CC for 10217 | P1.21-15,16 | 3-463 | 1-7   | Not present | P00798 | A106  | 2      | Sus     | 22     | Sus     | 1      | Sus     | 39631      |
| 171-15   | M37612 | W    | NmW    | 2015 | Niger   | OuALLAM       | 11    | CC11/ET-37                 | P1.5,2      | 2-2   | 1-1   | NadA-2/3.6  | p0096  | B45   | 4      | Sus     | 1      | Sus     | 9      | Sus     | 39632      |
| 179-15   | M37613 | W    | NmW    | 2015 | Niger   | sAY           | 11    | CC11/ET-37                 | P1.5,2      | 2-2   | 1-1   | NadA-2/3.6  | p0096  | B45   | 4      | Sus     | 1      | Sus     | 9      | Sus     | 39633      |
| 583-15   | M37614 | W    | NmW    | 2015 | Niger   | MADAOuA       | 11    | CC11/ET-37                 | P1.5,2      | 2-2   | 1-1   | NadA-2/3.6  | p0096  | B45   | 4      | Sus     | 1      | Sus     | 9      | Sus     | 39634      |
| 587-15   | M37533 | C    | NmC    | 2015 | Niger   | NIAMEY        | 10217 | Unassigned<br>CC for 10217 | P1.21-15,16 | 3-463 | 1-7   | Not present | P00798 | A106  | 2      | Sus     | 22     | Sus     | 1      | Sus     | 39635      |
| 606-15   | M37534 | C    | NmC    | 2015 | Niger   | NIAMEY        | 10217 | Unassigned<br>CC for 10217 | P1.21-15,16 | 3-463 | 1-7   | Not present | P00798 | A106  | 2      | Sus     | 22     | Sus     | 1      | Sus     | 39636      |
| 645-15   | M37535 | C    | NmC    | 2015 | Niger   | DOGONDOuTCHI  | 10217 | Unassigned<br>CC for 10217 | P1.21-15,16 | 3-463 | 1-7   | Not present | P00798 | A106  | 2      | Sus     | 22     | Sus     | 1      | Sus     | 39637      |
| 666-15   | M37615 | W    | NmW    | 2015 | Niger   | GuIDAN ROuMJI | 11    | CC11/ET-37                 | P1.5,2      | 2-2   | 1-1   | NadA-2/3.6  | p0096  | B45   | 4      | Sus     | 1      | Sus     | 9      | Sus     | 39638      |
| 685-15   | M37536 | C    | NmC    | 2015 | Niger   | ILLELA        | 10217 | Unassigned<br>CC for 10217 | P1.21-15,16 | 3-463 | 1-7   | Not present | P00798 | A106  | 2      | Sus     | 22     | Sus     | 1      | Sus     | 39639      |
| 982-15   | NA     | C    | NmC    | 2015 | Niger   | NA            | 10217 | Unassigned<br>CC for 10217 | P1.21-15,16 | 3-463 | 1-7   | Not present | P00798 | A106  | 2      | Sus     | 22     | Sus     | 1      | Sus     | 39640      |
| 1010-15  | M37616 | W    | NmW    | 2015 | Niger   | DOGONDOuTCHI  | 11    | CC11/ET-37                 | P1.5,2      | 2-2   | 1-1   | NadA-2/3.6  | p0096  | B45   | 4      | Sus     | 1      | Sus     | 9      | Sus     | 39641      |
| 1024-15  | M37537 | C    | NmC    | 2015 | Niger   | OuALLAM       | 10217 | Unassigned<br>CC for 10217 | P1.21-15,16 | 3-463 | 1-7   | Not present | P00798 | A106  | 2      | Sus     | 22     | Sus     | 1      | Sus     | 39642      |
| 1025-15  | M37538 | C    | NmC    | 2015 | Niger   | OuALLAM       | 10217 | Unassigned<br>CC for 10217 | P1.21-15,16 | 3-463 | 1-7   | Not present | P00798 | A106  | 2      | Sus     | 22     | Sus     | 1      | Sus     | 39643      |
| 1063-15  | M37540 | C    | NmC    | 2015 | Niger   | KOLLO         | 10217 | Unassigned<br>CC for 10217 | P1.21-15,16 | 3-463 | 1-7   | Not present | P00798 | A106  | 2      | Sus     | 22     | Sus     | 1      | Sus     | 39644      |
| 1064-15  | M37617 | W    | NmW    | 2015 | Niger   | KOLLO         | 11    | CC11/ET-37                 | P1.5,2      | 2-277 | 1-84  | NadA-2/3.6  | p0096  | B45   | 4      | Sus     | 1      | Sus     | 9      | Sus     | 39645      |
| 1077-15  | M37541 | C    | NmC    | 2015 | Niger   | DOGONDOuTCHI  | 10217 | Unassigned<br>CC for 10217 | P1.21-15,16 | 3-463 | 1-7   | Not present | P00798 | A106  | 2      | Sus     | 22     | Sus     | 1      | Sus     | 39646      |
| 1082-15  | M37618 | W    | NmW    | 2015 | Niger   | DOGONDOuTCHI  | 11    | CC11/ET-37                 | P1.5,2      | 2-2   | 1-1   | NadA-2/3.6  | p0096  | B45   | 4      | Sus     | 1      | Sus     | 9      | Sus     | 39647      |

| Niger ID | Lab ID | sAsG | PCR sG | Year | Country | District     | ST*   | CC*                        | PorA†       | PorB† | FetA† | NadA§       | NhbA¶  | FHbp# | gyrA¶  |         | penA¶  |         | rpoB¶  |         | PubMLST ID |
|----------|--------|------|--------|------|---------|--------------|-------|----------------------------|-------------|-------|-------|-------------|--------|-------|--------|---------|--------|---------|--------|---------|------------|
|          |        |      |        |      |         |              |       |                            |             |       |       |             |        |       | allele | meaning | allele | meaning | allele | meaning |            |
| 1078-15  | M37542 | C    | NmC    | 2015 | Niger   | DOGONDOuTCHI | 10217 | Unassigned<br>CC for 10217 | P1.21-15,16 | 3-463 | 1-7   | Not present | P00798 | A106  | 2      | Sus     | 22     | Sus     | 1      | Sus     | 39648      |
| 1083-15  | M37619 | W    | NmW    | 2015 | Niger   | DOGONDOuTCHI | 11    | CC11/ET-37                 | P1.5,2      | 2-277 | 1-84  | NadA-2/3.6  | p0096  | B45   | 4      | Sus     | 1      | Sus     | 9      | Sus     | 39649      |
| 1090-15  | M37620 | W    | NmW    | 2015 | Niger   | DOGONDOuTCHI | 11    | CC11/ET-37                 | P1.5,2      | 2-277 | 1-84  | NadA-2/3.6  | p0096  | B45   | 4      | Sus     | 1      | Sus     | 9      | Sus     | 39650      |
| 1096-15  | M37621 | W    | NmW    | 2015 | Niger   | DOGONDOuTCHI | 11    | CC11/ET-37                 | P1.5,2      | 2-60  | 1-1   | NadA-2/3.6  | p0096  | B#    | 4      | Sus     | 1      | Sus     | 9      | Sus     | 39651      |
| 1098-15  | M37543 | C    | NmC    | 2015 | Niger   | DOGONDOuTCHI | 10217 | Unassigned<br>CC for 10217 | P1.21-15,16 | 3-463 | 1-7   | Not present | P00798 | A106  | 2      | Sus     | 22     | Sus     | 1      | Sus     | 39652      |
| 1099-15  | M37544 | C    | NmC    | 2015 | Niger   | DOGONDOuTCHI | 10217 | Unassigned<br>CC for 10217 | P1.21-15,16 | 3-463 | 1-7   | Not present | P00798 | A106  | 2      | Sus     | 22     | Sus     | 1      | Sus     | 39653      |
| 1103-15  | M37545 | C    | NmC    | 2015 | Niger   | DOGONDOuTCHI | 10217 | Unassigned<br>CC for 10217 | P1.21-15,16 | 3-463 | 1-7   | Not present | P00798 | A106  | 2      | Sus     | 22     | Sus     | 1      | Sus     | 39654      |
| 1168-15  | NA     | C    | NmC    | 2015 | Niger   | NA           | 10217 | Unassigned<br>CC for 10217 | P1.21-15,16 | 3-463 | 1-7   | Not present | P00798 | A106  | 2      | Sus     | 22     | Sus     | 1      | Sus     | 39655      |
| 1169-15  | M37546 | C    | NmC    | 2015 | Niger   | TERA         | 10217 | Unassigned                 | P1.21-15,16 | 3-463 | 1-7   | Not present | P00798 | A106  | 2      | Sus     | 22     | Sus     | 1      | Sus     | 39656      |
| 1172-15  | M37547 | C    | NmC    | 2015 | Niger   | TERA         | 10217 | Unassigned<br>CC for 10217 | P1.21-15,16 | 3-463 | 1-7   | Not present | P00798 | A106  | 2      | Sus     | 22     | Sus     | 1      | Sus     | 39657      |
| 1173-15  | M37548 | C    | NmC    | 2015 | Niger   | KOLLO        | 10217 | Unassigned<br>CC for 10217 | P1.21-15,16 | 3-463 | 1-7   | Not present | P00798 | A106  | 2      | Sus     | 22     | Sus     | 1      | Sus     | 39658      |
| 1174-15  | M37549 | C    | NmC    | 2015 | Niger   | TERA         | 10217 | Unassigned<br>CC for 10217 | P1.21-15,16 | 3-463 | 1-7   | Not present | P00798 | A106  | 2      | Sus     | 22     | Sus     | 1      | Sus     | 39659      |
| 1376-15  | M37550 | C    | NmC    | 2015 | Niger   | NIAMEY       | 10217 | Unassigned<br>CC for 10217 | P1.21-15,16 | 3-463 | 1-7   | Not present | P00798 | A106  | 2      | Sus     | 22     | Sus     | 1      | Sus     | 39767      |
| 1385-15  | M37551 | C    | NmC    | 2015 | Niger   | NIAMEY       | 10217 | Unassigned<br>CC for 10217 | P1.21-15,16 | 3-463 | 1-7   | Not present | P00798 | A106  | 2      | Sus     | 22     | Sus     | 1      | Sus     | 39768      |
| 1395-15  | NA     | C    | NmC    | 2015 | Niger   | NA           | 10217 | Unassigned<br>CC for 10217 | P1.21-15,16 | 3-463 | 1-7   | Not present | P00798 | A106  | 2      | Sus     | 22     | Sus     | 1      | Sus     | 39769      |
| 1396-15  | M37552 | C    | NmC    | 2015 | Niger   | NIAMEY       | 10217 | Unassigned<br>CC for 10217 | P1.21-15,16 | 3-463 | 1-7   | Not present | P00798 | A106  | 2      | Sus     | 22     | Sus     | 1      | Sus     | 39770      |
| 1434-15  | M37553 | C    | NmC    | 2015 | Niger   | NIAMEY       | 10217 | Unassigned<br>CC for 10217 | P1.21-15,16 | 3-463 | 1-7   | Not present | P00798 | A106  | 2      | Sus     | 22     | Sus     | 1      | Sus     | 39771      |
| 1437-15  | M37554 | C    | NmC    | 2015 | Niger   | NIAMEY       | 10217 | Unassigned<br>CC for 10217 | P1.21-15,16 | 3-463 | 1-7   | Not present | P00798 | A106  | 2      | Sus     | 22     | Sus     | 1      | Sus     | 39772      |
| 1640-15  | M37555 | C    | NmC    | 2015 | Niger   | KOLLO        | 10217 | Unassigned<br>CC for 10217 | P1.21-15,16 | 3-463 | 1-7   | Not present | P00798 | A106  | 2      | Sus     | 22     | Sus     | 1      | Sus     | 39773      |
| 1641-15  | M37556 | C    | NmC    | 2015 | Niger   | KOLLO        | 10217 | Unassigned<br>CC for 10217 | P1.21-15,16 | 3-463 | 1-7   | Not present | P00798 | A106  | 2      | Sus     | 22     | Sus     | 1      | Sus     | 39774      |
| 1658-15  | M37622 | W    | NmW    | 2015 | Niger   | NIAMEY       | 11    | CC11/ET-37                 | P1.5,2      | 2-2   | 1-1   | NadA-2/3.6  | p0096  | B45   | 4      | Sus     | 1      | Sus     | 9      | Sus     | 39775      |
| 1659-15  | M37557 | C    | NmC    | 2015 | Niger   | NIAMEY       | 10217 | Unassigned<br>CC for 10217 | P1.21-15,16 | 3-463 | 1-7   | Not present | P00798 | A106  | 2      | Sus     | 22     | Sus     | 1      | Sus     | 39776      |
| 1660-15  | M37558 | C    | NmC    | 2015 | Niger   | NIAMEY       | 10217 | Unassigned<br>CC for 10217 | P1.21-15,16 | 3-463 | 1-7   | Not present | P00798 | A106  | 2      | Sus     | 22     | Sus     | 1      | Sus     | 39777      |
| 1661-15  | M37559 | C    | NmC    | 2015 | Niger   | NIAMEY       | 10217 | Unassigned<br>CC for 10217 | P1.21-15,16 | 3-463 | 1-7   | Not present | P00798 | A106  | 2      | Sus     | 22     | Sus     | 1      | Sus     | 39778      |
| 1662-15  | M37560 | C    | NmC    | 2015 | Niger   | NIAMEY       | 10217 | Unassigned<br>CC for 10217 | P1.21-15,16 | 3-463 | 1-7   | Not present | P00798 | A106  | 2      | Sus     | 22     | Sus     | 1      | Sus     | 39779      |
| 1663-15  | M37561 | C    | NmC    | 2015 | Niger   | NIAMEY       | 10217 | Unassigned<br>CC for 10217 | P1.21-15,16 | 3-463 | 1-7   | Not present | P00798 | A106  | 2      | Sus     | 22     | Sus     | 1      | Sus     | 39780      |
| 1847-15  | M37623 | W    | NmW    | 2015 | Niger   | NIAMEY       | 11    | CC11/ET-37                 | P1.5,2      | 2-2   | 1-1   | NadA-2/3.6  | p0096  | B45   | 4      | Sus     | 1      | Sus     | 9      | Sus     | 39781      |

| Niger ID | Lab ID | sAsG | PCR sG | Year | Country | District     | ST*   | CC*                        | PorA†       | PorB† | FetA† | NadA§       | NhbA¶  | FHbp# | gyrA¶  |         | penA¶  |         | rpoB¶  |         | PubMLST ID |
|----------|--------|------|--------|------|---------|--------------|-------|----------------------------|-------------|-------|-------|-------------|--------|-------|--------|---------|--------|---------|--------|---------|------------|
|          |        |      |        |      |         |              |       |                            |             |       |       |             |        |       | allele | meaning | allele | meaning | allele | meaning |            |
| 1898-15  | M37562 | C    | NmC    | 2015 | Niger   | KOLLO        | 10217 | Unassigned<br>CC for 10217 | P1.21-15,16 | 3-463 | 1-7   | Not present | P00798 | A106  | 2      | Sus     | 22     | Sus     | 1      | Sus     | 39782      |
| 1945-15  | M37563 | C    | NmC    | 2015 | Niger   | NIAMEY       | 10217 | Unassigned<br>CC for 10217 | P1.21-15,16 | 3-463 | 1-7   | Not present | P00798 | A106  | 2      | Sus     | 22     | Sus     | 1      | Sus     | 39783      |
| 1946-15  | M37564 | C    | NmC    | 2015 | Niger   | NIAMEY       | 10217 | Unassigned<br>CC for 10217 | P1.21-15,16 | 3-463 | 1-7   | Not present | P00798 | A106  | 2      | Sus     | 22     | Sus     | 1      | Sus     | 39784      |
| 1947-15  | M37565 | C    | NmC    | 2015 | Niger   | NIAMEY       | 10217 | Unassigned<br>CC for 10217 | P1.21-15,16 | 3-463 | 1-7   | Not present | P00798 | A106  | 2      | Sus     | 22     | Sus     | 1      | Sus     | 39785      |
| 1956-15  | M37566 | C    | NmC    | 2015 | Niger   | NIAMEY       | 10217 | Unassigned<br>CC for 10217 | P1.21-15,16 | 3-463 | 1-7   | Not present | P00798 | A106  | 2      | Sus     | 22     | Sus     | 1      | Sus     | 39786      |
| 2007-15  | M37567 | C    | NmC    | 2015 | Niger   | DOGONDOuTCHI | 10217 | Unassigned<br>CC for 10217 | P1.21-15,16 | 3-463 | 1-7   | Not present | P00798 | A106  | 2      | Sus     | 22     | Sus     | 1      | Sus     | 39787      |
| 2014-15  | M37568 | C    | NmC    | 2015 | Niger   | DOGONDOuTCHI | 10217 | Unassigned<br>CC for 10217 | P1.21-15,16 | 3-463 | 1-7   | Not present | P00798 | A106  | 2      | Sus     | 22     | Sus     | 1      | Sus     | 39788      |
| 2015-15  | M37569 | C    | NmC    | 2015 | Niger   | DOGONDOuTCHI | 10217 | Unassigned<br>CC for 10217 | P1.21-15,16 | 3-463 | 1-7   | Not present | P00798 | A106  | 2      | Sus     | 22     | Sus     | 1      | Sus     | 39789      |
| 2023-15  | M37570 | C    | NmC    | 2015 | Niger   | DOGONDOuTCHI | 10217 | Unassigned<br>CC for 10217 | P1.21-15,16 | 3-463 | 1-7   | Not present | P00798 | A106  | 2      | Sus     | 22     | Sus     | 1      | Sus     | 39790      |
| 2029-15  | M37624 | W    | NmW    | 2015 | Niger   | DOGONDOuTCHI | 11    | CC11/ET-37                 | P1.5,2      | 2-277 | 1-84  | NadA-2/3.6  | p0096  | B45   | 4      | Sus     | 1      | Sus     | 9      | Sus     | 39791      |
| 2043-15  | M37571 | C    | NmC    | 2015 | Niger   | DOGONDOuTCHI | 10217 | Unassigned<br>CC for 10217 | P1.21-15,16 | 3-463 | 1-7   | Not present | P00798 | A106  | 2      | Sus     | 22     | Sus     | 1      | Sus     | 39792      |
| 2081-15  | M37572 | C    | NmC    | 2015 | Niger   | FILINGuE     | 10217 | Unassigned<br>CC for 10217 | P1.21-15,16 | 3-463 | 1-7   | Not present | P00798 | A106  | 2      | Sus     | 22     | Sus     | 1      | Sus     | 39793      |
| 2085-15  | M37573 | C    | NmC    | 2015 | Niger   | FILINGuE     | 10217 | Unassigned<br>CC for 10217 | P1.21-15,16 | 3-463 | 1-7   | Not present | P00798 | A106  | 2      | Sus     | 22     | Sus     | 1      | Sus     | 39794      |
| 2099-15  | M37625 | W    | NmW    | 2015 | Niger   | KOLLO        | 11    | CC11/ET-37                 | P1.5,2      | 2-2   | 1-1   | NadA-2/3.6  | p0096  | B45   | 4      | Sus     | 1      | Sus     | 9      | Sus     | 39795      |
| 2137-15  | M37574 | C    | NmC    | 2015 | Niger   | DOGONDOuTCHI | 10217 | Unassigned<br>CC for 10217 | P1.21-15,16 | 3-463 | 1-7   | Not present | P00798 | A106  | 2      | Sus     | 22     | Sus     | 1      | Sus     | 39796      |
| 2143-15  | M37626 | W    | NmW    | 2015 | Niger   | DOGONDOuTCHI | 11    | CC11/ET-37                 | P1.5,2      | 2-277 | 1-84  | NadA-2/3.6  | p0096  | B45   | 4      | Sus     | 1      | Sus     | 9      | Sus     | 39797      |
| 2146-15  | M37627 | W    | NmW    | 2015 | Niger   | DOGONDOuTCHI | 11    | CC11/ET-37                 | P1.5,2      | 2-277 | 1-84  | NadA-2/3.6  | p0096  | B45   | 4      | Sus     | 1      | Sus     | 9      | Sus     | 39798      |
| 2380-15  | M37575 | C    | NmC    | 2015 | Niger   | NIAMEY       | 10217 | Unassigned<br>CC for 10217 | P1.21-15,16 | 3-463 | 1-7   | Not present | P00798 | A106  | 2      | Sus     | 22     | Sus     | 1      | Sus     | 39799      |
| 2385-15  | M37576 | C    | NmC    | 2015 | Niger   | TERA         | 10217 | Unassigned<br>CC for 10217 | P1.21-15,16 | 3-463 | 1-7   | Not present | P00798 | A106  | 2      | Sus     | 22     | Sus     | 1      | Sus     | 39800      |
| 2398-15  | M37578 | C    | NmC    | 2015 | Niger   | TERA         | 10217 | Unassigned<br>CC for 10217 | P1.21-15,16 | 3-463 | 1-7   | Not present | P00798 | A106  | 2      | Sus     | 22     | Sus     | 1      | Sus     | 39801      |
| 2399-15  | M37579 | C    | NmC    | 2015 | Niger   | TERA         | 10217 | Unassigned<br>CC for 10217 | P1.21-15,16 | 3-463 | 1-7   | Not present | P00798 | A106  | 2      | Sus     | 22     | Sus     | 1      | Sus     | 39802      |
| 2400-15  | M37580 | C    | NmC    | 2015 | Niger   | TERA         | 10217 | Unassigned<br>CC for 10217 | P1.21-15,16 | 3-463 | 1-7   | Not present | P00798 | A106  | 2      | Sus     | 22     | Sus     | 1      | Sus     | 39803      |
| 2401-15  | M37581 | C    | NmC    | 2015 | Niger   | TERA         | 10217 | Unassigned<br>CC for 10217 | P1.21-15,16 | 3-463 | 1-7   | Not present | P00798 | A106  | 2      | Sus     | 22     | Sus     | 1      | Sus     | 39804      |
| 2404-15  | M37582 | C    | NmC    | 2015 | Niger   | TERA         | 10217 | Unassigned<br>CC for 10217 | P1.21-15,16 | 3-463 | 1-7   | Not present | P00798 | A106  | 2      | Sus     | 22     | Sus     | 1      | Sus     | 39805      |
| 2405-15  | M37583 | C    | NmC    | 2015 | Niger   | TERA         | 10217 | Unassigned<br>CC for 10217 | P1.21-15,16 | 3-463 | 1-7   | Not present | P00798 | A106  | 2      | Sus     | 22     | Sus     | 1      | Sus     | 39806      |
| 2441-15  | M37584 | C    | NmC    | 2015 | Niger   | NIAMEY       | 10217 | Unassigned<br>CC for 10217 | P1.21-15,16 | 3-463 | 1-7   | Not present | P00798 | A106  | 2      | Sus     | 22     | Sus     | 1      | Sus     | 39807      |

| Niger ID | Lab ID | sAsG | PCR sG | Year | Country | District | ST*   | CC*                        | PorA†       | PorB† | FetA† | NadA§       | Nhba¶  | FHbp# | gyrA¶  |         | penA¶  |         | rpoB¶  |         | PubMLST ID |
|----------|--------|------|--------|------|---------|----------|-------|----------------------------|-------------|-------|-------|-------------|--------|-------|--------|---------|--------|---------|--------|---------|------------|
|          |        |      |        |      |         |          |       |                            |             |       |       |             |        |       | allele | meaning | allele | meaning | allele | meaning |            |
| 2464-15  | M37585 | C    | NmC    | 2015 | Niger   | NIAMEY   | 10217 | Unassigned<br>CC for 10217 | P1.21-15,16 | 3-463 | 1-7   | Not present | P00798 | A106  | 2      | Sus     | 22     | Sus     | 1      | Sus     | 39808      |
| 2491-15  | M37586 | C    | NmC    | 2015 | Niger   | NIAMEY   | 10217 | Unassigned<br>CC for 10217 | P1.21-15,16 | 3-463 | 1-7   | Not present | P00798 | A106  | 2      | Sus     | 22     | Sus     | 1      | Sus     | 39809      |
| 2548-15  | M37587 | C    | NmC    | 2015 | Niger   | NIAMEY   | 10217 | Unassigned<br>CC for 10217 | P1.21-15,16 | 3-463 | 1-7   | Not present | P00798 | A106  | 2      | Sus     | 22     | Sus     | 1      | Sus     | 39810      |
| 2586-15  | NA     | C    | NmC    | 2015 | Niger   | KOLLO    | 10217 | Unassigned<br>CC for 10217 | P1.21-15,16 | 3-463 | 1-7   | Not present | P00798 | A106  | 2      | Sus     | 22     | Sus     | 1      | Sus     | 39811      |
| 2749-15  | M37628 | W    | NmW    | 2015 | Niger   | MADAROU  | 11    | CC11/ET-37                 | P1.5,2      | 2-2   | 1-1   | NadA-2/3.6  | p0096  | B45   | 4      | Sus     | 1      | Sus     | 9      | Sus     | 39812      |
| 3180-15  | M37589 | C    | NmC    | 2015 | Niger   | NIAMEY   | 10217 | Unassigned<br>CC for 10217 | P1.21-15,16 | 3-463 | 1-7   | Not present | P00798 | A106  | 2      | Sus     | 22     | Sus     | 1      | Sus     | 39813      |
| 3217-15  | M37590 | C    | NmC    | 2015 | Niger   | NIAMEY   | 10217 | Unassigned<br>CC for 10217 | P1.21-15,16 | 3-463 | 1-7   | Not present | P00798 | A106  | 2      | Sus     | 22     | Sus     | 1      | Sus     | 39814      |
| 3411-15  | M37591 | C    | NmC    | 2015 | Niger   | NIAMEY   | 10217 | Unassigned<br>CC for 10217 | P1.21-15,16 | 3-463 | 1-7   | Not present | P00798 | A106  | 2      | Sus     | 22     | Sus     | 1      | Sus     | 39815      |
| 3412-15  | M37592 | C    | NmC    | 2015 | Niger   | NIAMEY   | 10217 | Unassigned<br>CC for 10217 | P1.21-15,16 | 3-463 | 1-7   | Not present | P00798 | A106  | 2      | Sus     | 22     | Sus     | 1      | Sus     | 39816      |
| 3422-15  | M37593 | C    | NmC    | 2015 | Niger   | NIAMEY   | 10217 | Unassigned<br>CC for 10217 | P1.21-15,16 | 3-463 | 1-7   | Not present | P00798 | A106  | 2      | Sus     | 22     | Sus     | 1      | Sus     | 39817      |
| 3479-15  | M37594 | C    | NmC    | 2015 | Niger   | DOGONDOU | 10217 | Unassigned<br>CC for 10217 | P1.21-15,16 | 3-463 | 1-7   | Not present | P00798 | A106  | 2      | Sus     | 22     | Sus     | 1      | Sus     | 39818      |
| 3641-15  | M37595 | C    | NmC    | 2015 | Niger   | NIAMEY   | 10217 | Unassigned<br>CC for 10217 | P1.21-15,16 | 3-463 | 1-7   | Not present | P00798 | A106  | 2      | Sus     | 22     | Sus     | 1      | Sus     | 39819      |
| 3642-15  | M37596 | C    | NmC    | 2015 | Niger   | NIAMEY   | 10217 | Unassigned<br>CC for 10217 | P1.21-15,16 | 3-463 | 1-7   | Not present | P00798 | A106  | 2      | Sus     | 22     | Sus     | 1      | Sus     | 39820      |
| 3643-15  | M37597 | C    | NmC    | 2015 | Niger   | NIAMEY   | 10217 | Unassigned<br>CC for 10217 | P1.21-15,16 | 3-463 | 1-7   | Not present | P00798 | A106  | 2      | Sus     | 22     | Sus     | 1      | Sus     | 39821      |
| 3644-15  | M37598 | C    | NmC    | 2015 | Niger   | NIAMEY   | 10217 | Unassigned<br>CC for 10217 | P1.21-15,16 | 3-463 | 1-7   | Not present | P00798 | A106  | 2      | Sus     | 22     | Sus     | 1      | Sus     | 39822      |
| 3645-15  | M37599 | C    | NmC    | 2015 | Niger   | NIAMEY   | 10217 | Unassigned<br>CC for 10217 | P1.21-15,16 | 3-463 | 1-7   | Not present | P00798 | A106  | 2      | Sus     | 22     | Sus     | 1      | Sus     | 39823      |
| 3769-15  | M37600 | C    | NmC    | 2015 | Niger   | sAY      | 10217 | Unassigned<br>CC for 10217 | P1.21-15,16 | 3-463 | 1-7   | Not present | P00798 | A106  | 2      | Sus     | 22     | Sus     | 1      | Sus     | 39824      |
| 3772-15  | M37601 | C    | NmC    | 2015 | Niger   | sAY      | 10217 | Unassigned<br>CC for 10217 | P1.21-15,16 | 3-463 | 1-7   | Not present | P00798 | A106  | 2      | Sus     | 22     | Sus     | 1      | Sus     | 39825      |
| 3828-15  | M37602 | C    | NmC    | 2015 | Niger   | GAYA     | 10217 | Unassigned<br>CC for 10217 | P1.21-15,16 | 3-463 | 1-7   | Not present | P00798 | A106  | 2      | Sus     | 22     | Sus     | 1      | Sus     | 39826      |
| 3833-15  | M37629 | W    | NmW    | 2015 | Niger   | GAYA     | 11    | CC11/ET-37                 | P1.5,2      | 2-2   | 1-1   | NadA-2/3.6  | p0096  | B45   | 4      | Sus     | 1      | Sus     | 9      | Sus     | 39827      |
| 3882-15  | M37603 | C    | NmC    | 2015 | Niger   | NIAMEY   | 10217 | Unassigned<br>CC for 10217 | P1.21-15,16 | 3-463 | 1-7   | Not present | P00798 | A106  | 2      | Sus     | 22     | Sus     | 1      | Sus     | 39828      |
| 3884-15  | M37604 | C    | NmC    | 2015 | Niger   | NIAMEY   | 10217 | Unassigned<br>CC for 10217 | P1.21-15,16 | 3-463 | 1-7   | Not present | P00798 | A106  | 2      | Sus     | 22     | Sus     | 1      | Sus     | 39829      |
| 3949-15  | M37605 | C    | NmC    | 2015 | Niger   | NIAMEY   | 10217 | Unassigned<br>CC for 10217 | P1.21-15,16 | 3-463 | 1-7   | Not present | P00798 | A106  | 2      | Sus     | 22     | Sus     | 1      | Sus     | 39830      |
| 3962-15  | M37606 | C    | NmC    | 2015 | Niger   | NIAMEY   | 10217 | Unassigned<br>CC for 10217 | P1.21-15,16 | 3-463 | 1-7   | Not present | P00798 | A106  | 2      | Sus     | 22     | Sus     | 1      | Sus     | 39831      |
| 4019-15  | M37607 | C    | NmC    | 2015 | Niger   | NIAMEY   | 10217 | Unassigned<br>CC for 10217 | P1.21-15,16 | 3-463 | 1-7   | Not present | P00798 | A106  | 2      | Sus     | 22     | Sus     | 1      | Sus     | 39832      |

| Niger ID | Lab ID | sAsG | PCR sG | Year | Country               | District | ST*   | CC*                        | PorA†       | PorB† | FetA† | NadA§       | NhbA¶  | FHbp# | gyrA¶  |         | penA¶  |         | rpoB¶  |         | PubMLST ID |
|----------|--------|------|--------|------|-----------------------|----------|-------|----------------------------|-------------|-------|-------|-------------|--------|-------|--------|---------|--------|---------|--------|---------|------------|
|          |        |      |        |      |                       |          |       |                            |             |       |       |             |        |       | allele | meaning | allele | meaning | allele | meaning |            |
| 4036-15  | M37608 | C    | NmC    | 2015 | Niger                 | NIAMEY   | 10217 | Unassigned<br>CC for 10217 | P1.21-15,16 | 3-463 | 1-7   | Not present | P00798 | A106  | 2      | Sus     | 22     | Sus     | 1      | Sus     | 39833      |
| 4064-15  | M37539 | C    | NmC    | 2015 | Niger                 | NA       | 10217 | Unassigned<br>CC for 10217 | P1.21-15,16 | 3-463 | 1-7   | Not present | P00798 | A106  | 2      | Sus     | 22     | Sus     | 1      | Sus     | 39834      |
| 2395-15  | M37577 | C    | NmC    | 2015 | Niger                 | NA       | 10217 | Unassigned<br>CC for 10217 | P1.21-15,16 | 3-463 | 1-7   | Not present | P00798 | A106  | 2      | Sus     | 22     | Sus     | 1      | Sus     | 39835      |
| NA       | M03473 | C    | NmC    | 1995 | Argentina             | NA       | 11    | CC11/ET-37                 | NA          | NA    | NA    | NA          | NA     | NA    | NA     | NA      | NA     | NA      | NA     | NA      | 39836      |
| NA       | M05730 | C    | NmC    | 1976 | Brazil                | NA       | 11    | CC11/ET-37                 | NA          | NA    | NA    | NA          | NA     | NA    | NA     | NA      | NA     | NA      | NA     | NA      | 39837      |
| NA       | M13970 | C    | NmC    | 2005 | Brazil                | NA       | 8     | CC8/cluster<br>A4          | NA          | NA    | NA    | NA          | NA     | NA    | NA     | NA      | NA     | NA      | NA     | NA      | 39838      |
| NA       | M13973 | C    | NmC    | 2005 | Brazil                | NA       | 5122  | CC103                      | NA          | NA    | NA    | NA          | NA     | NA    | NA     | NA      | NA     | NA      | NA     | NA      | 39839      |
| NA       | M14431 | C    | NmC    | 2005 | Brazil                | NA       | 3779  | CC103                      | NA          | NA    | NA    | NA          | NA     | NA    | NA     | NA      | NA     | NA      | NA     | NA      | 39840      |
| NA       | M09596 | C    | NG     | NA   | Burkina<br>Faso       | NA       | 192   | Unassigned<br>CC for 192   | NA          | NA    | NA    | NA          | NA     | NA    | NA     | NA      | NA     | NA      | NA     | NA      | 39841      |
| NA       | M04874 | C    | NmC    | 1997 | Canada                | NA       | 11    | CC11/ET-37                 | NA          | NA    | NA    | NA          | NA     | NA    | NA     | NA      | NA     | NA      | NA     | NA      | 39842      |
| NA       | M08566 | C    | NmC    | 2001 | Croatia               | NA       | 66    | CC8/cluster<br>A4          | NA          | NA    | NA    | NA          | NA     | NA    | NA     | NA      | NA     | NA      | NA     | NA      | 39843      |
| NA       | M22236 | C    | NmC    | 2010 | Djibouti              | NA       | 8797  | Unassigned<br>CC for 8797  | NA          | NA    | NA    | NA          | NA     | NA    | NA     | NA      | NA     | NA      | NA     | NA      | 39844      |
| NA       | M03564 | C    | NmC    | 1997 | Dominican<br>Republic | NA       | 11    | CC11/ET-37                 | NA          | NA    | NA    | NA          | NA     | NA    | NA     | NA      | NA     | NA      | NA     | NA      | 39845      |
| NA       | M05451 | C    | NmC    | 1998 | Dominican<br>Republic | NA       | 11    | CC11/ET-37                 | NA          | NA    | NA    | NA          | NA     | NA    | NA     | NA      | NA     | NA      | NA     | NA      | 39846      |
| NA       | M05831 | C    | NmC    | 1998 | Dominican<br>Republic | NA       | 11    | CC11/ET-37                 | NA          | NA    | NA    | NA          | NA     | NA    | NA     | NA      | NA     | NA      | NA     | NA      | 39847      |
| NA       | M05721 | C    | NmC    | 1996 | England               | NA       | 8     | CC8/Cluster<br>A4          | NA          | NA    | NA    | NA          | NA     | NA    | NA     | NA      | NA     | NA      | NA     | NA      | 39848      |
| NA       | M05731 | C    | NmC    | 1993 | England               | NA       | 11    | CC11/ET-37                 | NA          | NA    | NA    | NA          | NA     | NA    | NA     | NA      | NA     | NA      | NA     | NA      | 39849      |
| NA       | M05732 | C    | NmC    | 1984 | Ghana                 | NA       | 11    | CC11/ET-37                 | NA          | NA    | NA    | NA          | NA     | NA    | NA     | NA      | NA     | NA      | NA     | NA      | 39850      |
| NA       | M05733 | C    | NmC    | 1988 | Israel                | NA       | 11    | CC11/ET-37                 | NA          | NA    | NA    | NA          | NA     | NA    | NA     | NA      | NA     | NA      | NA     | NA      | 39851      |
| NA       | M05734 | C    | NmC    | 1984 | Italy                 | NA       | 11    | CC11/ET-37                 | NA          | NA    | NA    | NA          | NA     | NA    | NA     | NA      | NA     | NA      | NA     | NA      | 39852      |
| NA       | M05726 | C    | NmC    | 1994 | New<br>Zealand        | NA       | 66    | CC8/cluster<br>A4          | NA          | NA    | NA    | NA          | NA     | NA    | NA     | NA      | NA     | NA      | NA     | NA      | 39853      |
| NA       | M05749 | C    | NmC    | 1987 | Norway                | NA       | 32    | CC32/ET-5                  | NA          | NA    | NA    | NA          | NA     | NA    | NA     | NA      | NA     | NA      | NA     | NA      | 39854      |
| NA       | M05737 | C    | NmC    | 1990 | Scotland              | NA       | 11    | CC11/ET-37                 | NA          | NA    | NA    | NA          | NA     | NA    | NA     | NA      | NA     | NA      | NA     | NA      | 39855      |
| NA       | M05729 | C    | NmC    | 1990 | South<br>Africa       | NA       | 8     | CC8/cluster<br>A4          | NA          | NA    | NA    | NA          | NA     | NA    | NA     | NA      | NA     | NA      | NA     | NA      | 39856      |
| NA       | M14217 | C    | NmC    | 2005 | South<br>Africa       | NA       | 6281  | Unassigned<br>CC for 6281  | NA          | NA    | NA    | NA          | NA     | NA    | NA     | NA      | NA     | NA      | NA     | NA      | 39857      |
| NA       | M19586 | C    | NmC    | 2009 | South<br>Africa       | NA       | 6281  | Unassigned<br>CC for 6281  | NA          | NA    | NA    | NA          | NA     | NA    | NA     | NA      | NA     | NA      | NA     | NA      | 39858      |
| NA       | M05738 | C    | NmC    | 1985 | Spain                 | NA       | 11    | CC11/ET-37                 | NA          | NA    | NA    | NA          | NA     | NA    | NA     | NA      | NA     | NA      | NA     | NA      | 39859      |
| NA       | M28679 | C    | NmC    | 2014 | United<br>Kingdom     | NA       | 467   | CC269                      | NA          | NA    | NA    | NA          | NA     | NA    | NA     | NA      | NA     | NA      | NA     | NA      | 39860      |
| NA       | M00601 | C    | NmC    | 1994 | Venezuela             | NA       | 11    | CC11/ET-37                 | NA          | NA    | NA    | NA          | NA     | NA    | NA     | NA      | NA     | NA      | NA     | NA      | 39861      |
| NA       | M22440 | C    | NmC    | 2010 | Vietnam               | NA       | 344   | Unassigned<br>CC for 344   | NA          | NA    | NA    | NA          | NA     | NA    | NA     | NA      | NA     | NA      | NA     | NA      | 39862      |
| NA       | M37654 | C    | NmC    | 2015 | USA                   | NA       | 11    | CC11/ET-37                 | NA          | NA    | NA    | NA          | NA     | NA    | NA     | NA      | NA     | NA      | NA     | NA      | NA         |

| Niger ID | Lab_ID | sAsG | PCR sG | Year | Country      | District | ST*  | CC*        | PorA† | PorB† | FetA† | NadA§ | NhbA¶ | FHbp# | gyrA¶  |         | penA¶  |         | rpoB¶  |         | PubMLST ID |    |
|----------|--------|------|--------|------|--------------|----------|------|------------|-------|-------|-------|-------|-------|-------|--------|---------|--------|---------|--------|---------|------------|----|
|          |        |      |        |      |              |          |      |            |       |       |       |       |       |       | allele | meaning | allele | meaning | allele | meaning |            |    |
| NA       | M37398 | C    | NmC    | 2015 | USA          | NA       | 11   | CC11/ET-37 | NA    | NA    | NA    | NA    | NA    | NA    | NA     | NA      | NA     | NA      | NA     | NA      | NA         |    |
| NA       | M25683 | C    | NmC    | 2012 | USA          | NA       | 11   | CC11/ET-37 | NA    | NA    | NA    | NA    | NA    | NA    | NA     | NA      | NA     | NA      | NA     | NA      | NA         | NA |
| NA       | M25684 | C    | NmC    | 2012 | USA          | NA       | 11   | CC11/ET-37 | NA    | NA    | NA    | NA    | NA    | NA    | NA     | NA      | NA     | NA      | NA     | NA      | NA         | NA |
| NA       | M22722 | W    | NmW    | 2001 | Algeria      | NA       | 11   | CC11/ET-37 | NA    | NA    | NA    | NA    | NA    | NA    | NA     | NA      | NA     | NA      | NA     | NA      | NA         | NA |
| NA       | M22790 | W    | NmW    | 2004 | Benin        | NA       | 2881 | CC175      | NA    | NA    | NA    | NA    | NA    | NA    | NA     | NA      | NA     | NA      | NA     | NA      | NA         | NA |
| NA       | M22809 | W    | NmW    | 2006 | Benin        | NA       | 2881 | CC175      | NA    | NA    | NA    | NA    | NA    | NA    | NA     | NA      | NA     | NA      | NA     | NA      | NA         | NA |
| NA       | M22819 | W    | NmW    | 2007 | Benin        | NA       | 2881 | CC175      | NA    | NA    | NA    | NA    | NA    | NA    | NA     | NA      | NA     | NA      | NA     | NA      | NA         | NA |
| NA       | M07999 | W    | NmW    | 2001 | Burkina Faso | NA       | 11   | CC11/ET-37 | NA    | NA    | NA    | NA    | NA    | NA    | NA     | NA      | NA     | NA      | NA     | NA      | NA         | NA |
| NA       | M08000 | W    | NmW    | 2001 | Burkina Faso | NA       | 11   | CC11/ET-37 | NA    | NA    | NA    | NA    | NA    | NA    | NA     | NA      | NA     | NA      | NA     | NA      | NA         | NA |
| NA       | M08001 | W    | NmW    | 2001 | Burkina Faso | NA       | 11   | CC11/ET-37 | NA    | NA    | NA    | NA    | NA    | NA    | NA     | NA      | NA     | NA      | NA     | NA      | NA         | NA |
| NA       | M09261 | W    | NmW    | 2002 | Burkina Faso | NA       | 11   | CC11/ET-37 | NA    | NA    | NA    | NA    | NA    | NA    | NA     | NA      | NA     | NA      | NA     | NA      | NA         | NA |
| NA       | M09293 | W    | NmW    | 2002 | Burkina Faso | NA       | 11   | CC11/ET-37 | NA    | NA    | NA    | NA    | NA    | NA    | NA     | NA      | NA     | NA      | NA     | NA      | NA         | NA |
| NA       | M22797 | W    | NmW    | 2004 | Burkina Faso | NA       | 11   | CC11/ET-37 | NA    | NA    | NA    | NA    | NA    | NA    | NA     | NA      | NA     | NA      | NA     | NA      | NA         | NA |
| NA       | M22828 | W    | NmW    | 2008 | Burkina Faso | NA       | 2881 | CC175      | NA    | NA    | NA    | NA    | NA    | NA    | NA     | NA      | NA     | NA      | NA     | NA      | NA         | NA |
| NA       | M23413 | W    | NmW    | 2011 | Burkina Faso | NA       | 11   | CC11/ET-37 | NA    | NA    | NA    | NA    | NA    | NA    | NA     | NA      | NA     | NA      | NA     | NA      | NA         | NA |
| NA       | M23414 | W    | NmW    | 2011 | Burkina Faso | NA       | 11   | CC11/ET-37 | NA    | NA    | NA    | NA    | NA    | NA    | NA     | NA      | NA     | NA      | NA     | NA      | NA         | NA |
| NA       | M23415 | W    | NmW    | 2011 | Burkina Faso | NA       | 11   | CC11/ET-37 | NA    | NA    | NA    | NA    | NA    | NA    | NA     | NA      | NA     | NA      | NA     | NA      | NA         | NA |
| NA       | M23422 | W    | NmW    | 2011 | Burkina Faso | NA       | 11   | CC11/ET-37 | NA    | NA    | NA    | NA    | NA    | NA    | NA     | NA      | NA     | NA      | NA     | NA      | NA         | NA |
| NA       | M23423 | W    | NmW    | 2011 | Burkina Faso | NA       | 11   | CC11/ET-37 | NA    | NA    | NA    | NA    | NA    | NA    | NA     | NA      | NA     | NA      | NA     | NA      | NA         | NA |
| NA       | M23426 | W    | NmW    | 2011 | Burkina Faso | NA       | 11   | CC11/ET-37 | NA    | NA    | NA    | NA    | NA    | NA    | NA     | NA      | NA     | NA      | NA     | NA      | NA         | NA |
| NA       | M24705 | W    | NmW    | 2010 | Burkina Faso | NA       | 8638 | CC175      | NA    | NA    | NA    | NA    | NA    | NA    | NA     | NA      | NA     | NA      | NA     | NA      | NA         | NA |
| NA       | M24730 | W    | NmW    | 2011 | Burkina Faso | NA       | 11   | CC11/ET-37 | NA    | NA    | NA    | NA    | NA    | NA    | NA     | NA      | NA     | NA      | NA     | NA      | NA         | NA |
| NA       | M24731 | W    | NmW    | 2011 | Burkina Faso | NA       | 11   | CC11/ET-37 | NA    | NA    | NA    | NA    | NA    | NA    | NA     | NA      | NA     | NA      | NA     | NA      | NA         | NA |
| NA       | M24734 | W    | NmW    | 2011 | Burkina Faso | NA       | 11   | CC11/ET-37 | NA    | NA    | NA    | NA    | NA    | NA    | NA     | NA      | NA     | NA      | NA     | NA      | NA         | NA |
| NA       | M25430 | W    | NmW    | 2012 | Burkina Faso | NA       | 11   | CC11/ET-37 | NA    | NA    | NA    | NA    | NA    | NA    | NA     | NA      | NA     | NA      | NA     | NA      | NA         | NA |
| NA       | M25431 | W    | NmW    | 2012 | Burkina Faso | NA       | 2881 | CC175      | NA    | NA    | NA    | NA    | NA    | NA    | NA     | NA      | NA     | NA      | NA     | NA      | NA         | NA |
| NA       | M25432 | W    | NmW    | 2012 | Burkina Faso | NA       | 11   | CC11/ET-37 | NA    | NA    | NA    | NA    | NA    | NA    | NA     | NA      | NA     | NA      | NA     | NA      | NA         | NA |

| Niger ID | Lab_ID | sAsG | PCR sG | Year | Country                  | District | ST* | CC*        | PorA† | PorB† | FetA† | NadA§ | NhbA¶ | FHbp# | gyrA¶  |         | penA¶  |         | rpoB¶  |         | PubMLST ID |    |
|----------|--------|------|--------|------|--------------------------|----------|-----|------------|-------|-------|-------|-------|-------|-------|--------|---------|--------|---------|--------|---------|------------|----|
|          |        |      |        |      |                          |          |     |            |       |       |       |       |       |       | allele | meaning | allele | meaning | allele | meaning |            |    |
| NA       | M25433 | W    | NmW    | 2012 | Burkina Faso             | NA       | 11  | CC11/ET-37 | NA    | NA    | NA    | NA    | NA    | NA    | NA     | NA      | NA     | NA      | NA     | NA      | NA         |    |
| NA       | M25434 | W    | NmW    | 2012 | Burkina Faso             | NA       | 11  | CC11/ET-37 | NA    | NA    | NA    | NA    | NA    | NA    | NA     | NA      | NA     | NA      | NA     | NA      | NA         | NA |
| NA       | M25435 | W    | NmW    | 2012 | Burkina Faso             | NA       | 11  | CC11/ET-37 | NA    | NA    | NA    | NA    | NA    | NA    | NA     | NA      | NA     | NA      | NA     | NA      | NA         | NA |
| NA       | M25436 | W    | NmW    | 2012 | Burkina Faso             | NA       | 11  | CC11/ET-37 | NA    | NA    | NA    | NA    | NA    | NA    | NA     | NA      | NA     | NA      | NA     | NA      | NA         | NA |
| NA       | M25438 | W    | NmW    | 2012 | Burkina Faso             | NA       | 11  | CC11/ET-37 | NA    | NA    | NA    | NA    | NA    | NA    | NA     | NA      | NA     | NA      | NA     | NA      | NA         | NA |
| NA       | M25440 | W    | NmW    | 2012 | Burkina Faso             | NA       | 11  | CC11/ET-37 | NA    | NA    | NA    | NA    | NA    | NA    | NA     | NA      | NA     | NA      | NA     | NA      | NA         | NA |
| NA       | M25456 | W    | NmW    | 2012 | Burkina Faso             | NA       | 11  | CC11/ET-37 | NA    | NA    | NA    | NA    | NA    | NA    | NA     | NA      | NA     | NA      | NA     | NA      | NA         | NA |
| NA       | M25459 | W    | NmW    | 2012 | Burkina Faso             | NA       | 11  | CC11/ET-37 | NA    | NA    | NA    | NA    | NA    | NA    | NA     | NA      | NA     | NA      | NA     | NA      | NA         | NA |
| NA       | M25462 | W    | NmW    | 2012 | Burkina Faso             | NA       | 11  | CC11/ET-37 | NA    | NA    | NA    | NA    | NA    | NA    | NA     | NA      | NA     | NA      | NA     | NA      | NA         | NA |
| NA       | M25467 | W    | NmW    | 2012 | Burkina Faso             | NA       | 11  | CC11/ET-37 | NA    | NA    | NA    | NA    | NA    | NA    | NA     | NA      | NA     | NA      | NA     | NA      | NA         | NA |
| NA       | M25468 | W    | NmW    | 2012 | Burkina Faso             | NA       | 11  | CC11/ET-37 | NA    | NA    | NA    | NA    | NA    | NA    | NA     | NA      | NA     | NA      | NA     | NA      | NA         | NA |
| NA       | M25469 | W    | NmW    | 2012 | Burkina Faso             | NA       | 11  | CC11/ET-37 | NA    | NA    | NA    | NA    | NA    | NA    | NA     | NA      | NA     | NA      | NA     | NA      | NA         | NA |
| NA       | M25470 | W    | NmW    | 2012 | Burkina Faso             | NA       | 11  | CC11/ET-37 | NA    | NA    | NA    | NA    | NA    | NA    | NA     | NA      | NA     | NA      | NA     | NA      | NA         | NA |
| NA       | M25471 | W    | NmW    | 2012 | Burkina Faso             | NA       | 11  | CC11/ET-37 | NA    | NA    | NA    | NA    | NA    | NA    | NA     | NA      | NA     | NA      | NA     | NA      | NA         | NA |
| NA       | M25472 | W    | NmW    | 2012 | Burkina Faso             | NA       | 11  | CC11/ET-37 | NA    | NA    | NA    | NA    | NA    | NA    | NA     | NA      | NA     | NA      | NA     | NA      | NA         | NA |
| NA       | M25473 | W    | NmW    | 2012 | Burkina Faso             | NA       | 11  | CC11/ET-37 | NA    | NA    | NA    | NA    | NA    | NA    | NA     | NA      | NA     | NA      | NA     | NA      | NA         | NA |
| NA       | M25474 | W    | NmW    | 2012 | Burkina Faso             | NA       | 11  | CC11/ET-37 | NA    | NA    | NA    | NA    | NA    | NA    | NA     | NA      | NA     | NA      | NA     | NA      | NA         | NA |
| NA       | M25476 | W    | NmW    | 2012 | Burkina Faso             | NA       | 11  | CC11/ET-37 | NA    | NA    | NA    | NA    | NA    | NA    | NA     | NA      | NA     | NA      | NA     | NA      | NA         | NA |
| NA       | M27559 | W    | NmW    | 2011 | Burkina Faso             | NA       | 11  | CC11/ET-37 | NA    | NA    | NA    | NA    | NA    | NA    | NA     | NA      | NA     | NA      | NA     | NA      | NA         | NA |
| NA       | M22740 | W    | NmW    | 2001 | Cameroon                 | NA       | 11  | CC11/ET-37 | NA    | NA    | NA    | NA    | NA    | NA    | NA     | NA      | NA     | NA      | NA     | NA      | NA         | NA |
| NA       | M22747 | W    | NmW    | 2001 | Central African Republic | NA       | 11  | CC11/ET-37 | NA    | NA    | NA    | NA    | NA    | NA    | NA     | NA      | NA     | NA      | NA     | NA      | NA         | NA |
| NA       | M22748 | W    | NmW    | 2001 | Central African Republic | NA       | 11  | CC11/ET-37 | NA    | NA    | NA    | NA    | NA    | NA    | NA     | NA      | NA     | NA      | NA     | NA      | NA         | NA |
| NA       | M22803 | W    | NmW    | 2005 | Chad                     | NA       | 11  | CC11/ET-37 | NA    | NA    | NA    | NA    | NA    | NA    | NA     | NA      | NA     | NA      | NA     | NA      | NA         | NA |
| NA       | M22801 | W    | NmW    | 2004 | Djibouti                 | NA       | 11  | CC11/ET-37 | NA    | NA    | NA    | NA    | NA    | NA    | NA     | NA      | NA     | NA      | NA     | NA      | NA         | NA |
| NA       | M07165 | W    | NmW    | 1995 | Gambia                   | NA       | 11  | CC11/ET-37 | NA    | NA    | NA    | NA    | NA    | NA    | NA     | NA      | NA     | NA      | NA     | NA      | NA         | NA |

| Niger ID | Lab_ID | sAsG | PCR sG | Year | Country      | District | ST*  | CC*        | PorA† | PorB† | FetA† | NadA§ | NhbA¶ | FHbp# | gyrA¶  |         | penA¶  |         | rpoB¶  |         | PubMLST ID |    |
|----------|--------|------|--------|------|--------------|----------|------|------------|-------|-------|-------|-------|-------|-------|--------|---------|--------|---------|--------|---------|------------|----|
|          |        |      |        |      |              |          |      |            |       |       |       |       |       |       | allele | meaning | allele | meaning | allele | meaning |            |    |
| NA       | M07161 | W    | NmW    | 1994 | Mali         | NA       | 11   | CC11/ET-37 | NA    | NA    | NA    | NA    | NA    | NA    | NA     | NA      | NA     | NA      | NA     | NA      | NA         |    |
| NA       | M07162 | W    | NmW    | 1994 | Mali         | NA       | 11   | CC11/ET-37 | NA    | NA    | NA    | NA    | NA    | NA    | NA     | NA      | NA     | NA      | NA     | NA      | NA         | NA |
| NA       | M12752 | W    | NmW    | NA   | Mali         | NA       | 11   | CC11/ET-37 | NA    | NA    | NA    | NA    | NA    | NA    | NA     | NA      | NA     | NA      | NA     | NA      | NA         | NA |
| NA       | M22160 | W    | NmW    | 2007 | Mali         | NA       | 11   | CC11/ET-37 | NA    | NA    | NA    | NA    | NA    | NA    | NA     | NA      | NA     | NA      | NA     | NA      | NA         | NA |
| NA       | M22189 | W    | NmW    | 2007 | Mali         | NA       | 11   | CC11/ET-37 | NA    | NA    | NA    | NA    | NA    | NA    | NA     | NA      | NA     | NA      | NA     | NA      | NA         | NA |
| NA       | M22191 | W    | NmW    | 2007 | Mali         | NA       | 11   | CC11/ET-37 | NA    | NA    | NA    | NA    | NA    | NA    | NA     | NA      | NA     | NA      | NA     | NA      | NA         | NA |
| NA       | M25070 | W    | NmW    | 2012 | Mali         | NA       | 11   | CC11/ET-37 | NA    | NA    | NA    | NA    | NA    | NA    | NA     | NA      | NA     | NA      | NA     | NA      | NA         | NA |
| NA       | M25073 | W    | NmW    | 2012 | Mali         | NA       | 11   | CC11/ET-37 | NA    | NA    | NA    | NA    | NA    | NA    | NA     | NA      | NA     | NA      | NA     | NA      | NA         | NA |
| NA       | M25074 | W    | NmW    | 2012 | Mali         | NA       | 11   | CC11/ET-37 | NA    | NA    | NA    | NA    | NA    | NA    | NA     | NA      | NA     | NA      | NA     | NA      | NA         | NA |
| NA       | M25075 | W    | NmW    | 2012 | Mali         | NA       | 11   | CC11/ET-37 | NA    | NA    | NA    | NA    | NA    | NA    | NA     | NA      | NA     | NA      | NA     | NA      | NA         | NA |
| NA       | M25076 | W    | NmW    | 2012 | Mali         | NA       | 11   | CC11/ET-37 | NA    | NA    | NA    | NA    | NA    | NA    | NA     | NA      | NA     | NA      | NA     | NA      | NA         | NA |
| NA       | M25077 | W    | NmW    | 2012 | Mali         | NA       | 11   | CC11/ET-37 | NA    | NA    | NA    | NA    | NA    | NA    | NA     | NA      | NA     | NA      | NA     | NA      | NA         | NA |
| NA       | M25078 | W    | NmW    | 2012 | Mali         | NA       | 11   | CC11/ET-37 | NA    | NA    | NA    | NA    | NA    | NA    | NA     | NA      | NA     | NA      | NA     | NA      | NA         | NA |
| NA       | M25079 | W    | NmW    | 2012 | Mali         | NA       | 11   | CC11/ET-37 | NA    | NA    | NA    | NA    | NA    | NA    | NA     | NA      | NA     | NA      | NA     | NA      | NA         | NA |
| NA       | M25080 | W    | NmW    | 2012 | Mali         | NA       | 11   | CC11/ET-37 | NA    | NA    | NA    | NA    | NA    | NA    | NA     | NA      | NA     | NA      | NA     | NA      | NA         | NA |
| NA       | M25081 | W    | NmW    | 2012 | Mali         | NA       | 11   | CC11/ET-37 | NA    | NA    | NA    | NA    | NA    | NA    | NA     | NA      | NA     | NA      | NA     | NA      | NA         | NA |
| NA       | M25082 | W    | NmW    | 2012 | Mali         | NA       | 11   | CC11/ET-37 | NA    | NA    | NA    | NA    | NA    | NA    | NA     | NA      | NA     | NA      | NA     | NA      | NA         | NA |
| NA       | M25086 | W    | NmW    | 2012 | Mali         | NA       | 11   | CC11/ET-37 | NA    | NA    | NA    | NA    | NA    | NA    | NA     | NA      | NA     | NA      | NA     | NA      | NA         | NA |
| NA       | M25087 | W    | NmW    | 2012 | Mali         | NA       | 11   | CC11/ET-37 | NA    | NA    | NA    | NA    | NA    | NA    | NA     | NA      | NA     | NA      | NA     | NA      | NA         | NA |
| NA       | M25088 | W    | NmW    | 2012 | Mali         | NA       | 11   | CC11/ET-37 | NA    | NA    | NA    | NA    | NA    | NA    | NA     | NA      | NA     | NA      | NA     | NA      | NA         | NA |
| NA       | M25089 | W    | NmW    | 2012 | Mali         | NA       | 11   | CC11/ET-37 | NA    | NA    | NA    | NA    | NA    | NA    | NA     | NA      | NA     | NA      | NA     | NA      | NA         | NA |
| NA       | M25093 | W    | NmW    | 2012 | Mali         | NA       | 11   | CC11/ET-37 | NA    | NA    | NA    | NA    | NA    | NA    | NA     | NA      | NA     | NA      | NA     | NA      | NA         | NA |
| NA       | M25094 | W    | NmW    | 2012 | Mali         | NA       | 11   | CC11/ET-37 | NA    | NA    | NA    | NA    | NA    | NA    | NA     | NA      | NA     | NA      | NA     | NA      | NA         | NA |
| NA       | M25100 | W    | NmW    | 2012 | Mali         | NA       | 11   | CC11/ET-37 | NA    | NA    | NA    | NA    | NA    | NA    | NA     | NA      | NA     | NA      | NA     | NA      | NA         | NA |
| NA       | M25101 | W    | NmW    | 2012 | Mali         | NA       | 11   | CC11/ET-37 | NA    | NA    | NA    | NA    | NA    | NA    | NA     | NA      | NA     | NA      | NA     | NA      | NA         | NA |
| NA       | M25102 | W    | NmW    | 2012 | Mali         | NA       | 11   | CC11/ET-37 | NA    | NA    | NA    | NA    | NA    | NA    | NA     | NA      | NA     | NA      | NA     | NA      | NA         | NA |
| NA       | M25103 | W    | NmW    | 2012 | Mali         | NA       | 11   | CC11/ET-37 | NA    | NA    | NA    | NA    | NA    | NA    | NA     | NA      | NA     | NA      | NA     | NA      | NA         | NA |
| NA       | M25104 | W    | NmW    | 2012 | Mali         | NA       | 11   | CC11/ET-37 | NA    | NA    | NA    | NA    | NA    | NA    | NA     | NA      | NA     | NA      | NA     | NA      | NA         | NA |
| NA       | M25106 | W    | NmW    | 2012 | Mali         | NA       | 11   | CC11/ET-37 | NA    | NA    | NA    | NA    | NA    | NA    | NA     | NA      | NA     | NA      | NA     | NA      | NA         | NA |
| NA       | M25107 | W    | NmW    | 2012 | Mali         | NA       | 11   | CC11/ET-37 | NA    | NA    | NA    | NA    | NA    | NA    | NA     | NA      | NA     | NA      | NA     | NA      | NA         | NA |
| NA       | M25108 | W    | NmW    | 2012 | Mali         | NA       | 11   | CC11/ET-37 | NA    | NA    | NA    | NA    | NA    | NA    | NA     | NA      | NA     | NA      | NA     | NA      | NA         | NA |
| NA       | M25109 | W    | NmW    | 2012 | Mali         | NA       | 11   | CC11/ET-37 | NA    | NA    | NA    | NA    | NA    | NA    | NA     | NA      | NA     | NA      | NA     | NA      | NA         | NA |
| NA       | M25110 | W    | NmW    | 2012 | Mali         | NA       | 11   | CC11/ET-37 | NA    | NA    | NA    | NA    | NA    | NA    | NA     | NA      | NA     | NA      | NA     | NA      | NA         | NA |
| NA       | M25111 | W    | NmW    | 2012 | Mali         | NA       | 11   | CC11/ET-37 | NA    | NA    | NA    | NA    | NA    | NA    | NA     | NA      | NA     | NA      | NA     | NA      | NA         | NA |
| NA       | M22718 | W    | NmW    | 2001 | Mauritius    | Candos   | 11   | CC11/ET-37 | NA    | NA    | NA    | NA    | NA    | NA    | NA     | NA      | NA     | NA      | NA     | NA      | NA         | NA |
| NA       | M22759 | W    | NmW    | 2001 | Niger        | Niamey   | 11   | CC11/ET-37 | NA    | NA    | NA    | NA    | NA    | NA    | NA     | NA      | NA     | NA      | NA     | NA      | NA         | NA |
| NA       | M22769 | W    | NmW    | 2002 | Niger        | Niamey   | 11   | CC11/ET-37 | NA    | NA    | NA    | NA    | NA    | NA    | NA     | NA      | NA     | NA      | NA     | NA      | NA         | NA |
| NA       | M22783 | W    | NmW    | 2003 | Niger        | Niamey   | 2881 | CC175      | NA    | NA    | NA    | NA    | NA    | NA    | NA     | NA      | NA     | NA      | NA     | NA      | NA         | NA |
| NA       | M22804 | W    | NmW    | 2005 | Niger        | Niamey   | 2881 | CC175      | NA    | NA    | NA    | NA    | NA    | NA    | NA     | NA      | NA     | NA      | NA     | NA      | NA         | NA |
| NA       | M22811 | W    | NmW    | 2006 | Niger        | Dosso    | 2881 | CC175      | NA    | NA    | NA    | NA    | NA    | NA    | NA     | NA      | NA     | NA      | NA     | NA      | NA         | NA |
| NA       | M07149 | W    | NmW    | 2000 | Saudi Arabia | NA       | 11   | CC11/ET-37 | NA    | NA    | NA    | NA    | NA    | NA    | NA     | NA      | NA     | NA      | NA     | NA      | NA         | NA |
| NA       | M22772 | W    | NmW    | 2002 | Senegal      | NA       | 11   | CC11/ET-37 | NA    | NA    | NA    | NA    | NA    | NA    | NA     | NA      | NA     | NA      | NA     | NA      | NA         | NA |
| NA       | M07293 | W    | NmW    | 2000 | South Africa | NA       | 22   | CC22       | NA    | NA    | NA    | NA    | NA    | NA    | NA     | NA      | NA     | NA      | NA     | NA      | NA         | NA |
| NA       | M25419 | W    | NmW    | 2012 | South Africa | NA       | 11   | CC11/ET-37 | NA    | NA    | NA    | NA    | NA    | NA    | NA     | NA      | NA     | NA      | NA     | NA      | NA         | NA |
| NA       | M22822 | W    | NmW    | 2007 | Togo         | NA       | 2881 | CC175      | NA    | NA    | NA    | NA    | NA    | NA    | NA     | NA      | NA     | NA      | NA     | NA      | NA         | NA |



| Niger ID | Lab ID | sAsG | PCR sG | Year | Country | District | ST* | CC* | PorA† | PorB† | FetA† | NadA§ | NhbA¶ | FHbp# | gyrA¶ | penA¶ | rpoB¶ | PubMLST ID |
|----------|--------|------|--------|------|---------|----------|-----|-----|-------|-------|-------|-------|-------|-------|-------|-------|-------|------------|
|----------|--------|------|--------|------|---------|----------|-----|-----|-------|-------|-------|-------|-------|-------|-------|-------|-------|------------|

\*CC, clonal complex; CDC, Centers for Disease Control and Prevention; ID, identifier; NA, not applicable; n.a., not assigned; NmC, *N. meningitidis* serogroup C; NmW, *N. meningitidis* serogroup W; Sus, susceptible; ST, sequence type. ST and CC are derived from multilocus sequence typing. The CC for sT-10217 is Not assigned (n.a.).

†PorA, PorB, and FetA are typed according to their respective variable regions.

§NadA is categorized by Novartis conventions of variant and peptide ID.

¶The alleles for gyrA, penA, and rpoB are identified by PubMLST DNA allele IDs. NhbA is identified by PubMLST peptide ID..

#FHbp is identified by the PubMLST peptide ID and the Pfizer peptide ID (subfamilies A and B). Assignment of Pfizer peptide ID is pending for peptide 841.

**Technical Appendix Table 2.** Genome coverage information and statistics for each *Neisseria meningitidis* isolate analyzed, Niger, 2015

| Isolate | Synonym | Bases in contigs | Contig counts | PacBio depth of coverage | Illumina depth of coverage | Circular assembly |
|---------|---------|------------------|---------------|--------------------------|----------------------------|-------------------|
| M37531  | 19-15   | 2175296          | 1             | 146.7                    | 464.93                     | Yes               |
| M37532  | 126-15  | 2170282          | 1             | 100.2                    | 469.54                     | Yes               |
| M37533  | 587-15  | 2174310          | 1             | 120.23                   | 720.66                     | Yes               |
| M37534  | 606-15  | 2174329          | 1             | 93.1                     | 662.60                     | Yes               |
| M37535  | 645-15  | 2174366          | 1             | 165.83                   | 632.19                     | Yes               |
| M37536  | 685-15  | 2174321          | 1             | 140.76                   | 507.78                     | Yes               |
| M37537  | 1024-15 | 2174294          | 1             | 189.7                    | 531.74                     | Yes               |
| M37538  | 1025-15 | 2169856          | 1             | 176.19                   | 485.66                     | Yes               |
| M37539  | 4064_15 | 2172023          | 1             | 133.52                   | 402.72                     | No                |
| M37540  | 1063-15 | 2174321          | 1             | 144.12                   | 363.56                     | Yes               |
| M37541  | 1077-15 | 2183924          | 1             | 134.68                   | 457.09                     | Yes               |
| M37542  | 1078-15 | 2175816          | 1             | 171.5                    | 481.52                     | Yes               |
| M37543  | 1098-15 | 2174300          | 1             | 151.45                   | 504.09                     | Yes               |
| M37544  | 1099-15 | 2174220          | 1             | 151                      | 425.30                     | Yes               |
| M37545  | 1103-15 | 2174310          | 1             | 133.56                   | 457.55                     | Yes               |
| M37546  | 1169-15 | 2174333          | 1             | 166.45                   | 523.45                     | Yes               |
| M37547  | 1172-15 | 2174332          | 1             | 170.96                   | 369.55                     | Yes               |
| M37548  | 1173-15 | 2174303          | 1             | 166.44                   | 337.75                     | Yes               |
| M37549  | 1174-15 | 2172497          | 1             | 173.99                   | 415.62                     | Yes               |
| M37550  | 1376-15 | 2174309          | 1             | 102.32                   | 402.26                     | Yes               |
| M37551  | 1385-15 | 2174223          | 1             | 125.71                   | 434.52                     | Yes               |
| M37552  | 1396-15 | 2168525          | 1             | 82.93                    | 564.00                     | Yes               |
| M37553  | 1434-15 | 2166229          | 1             | 159.33                   | 668.59                     | Yes               |
| M37554  | 1437-15 | 2166233          | 1             | 198.32                   | 523.45                     | Yes               |
| M37555  | 1640-15 | 2174308          | 1             | 153.76                   | 417.93                     | Yes               |
| M37556  | 1641-15 | 2173021          | 1             | 117.79                   | 401.80                     | No                |
| M37557  | 1659-15 | 2190989          | 1             | 144.39                   | 496.26                     | No                |
| M37558  | 1660-15 | 2174302          | 1             | 147.05                   | 289.37                     | Yes               |
| M37559  | 1661-15 | 2174328          | 1             | 112.79                   | 401.34                     | Yes               |
| M37560  | 1662-15 | 2174310          | 1             | 97.41                    | 470.46                     | Yes               |
| M37561  | 1663-15 | 2174326          | 1             | 88.62                    | 429.45                     | Yes               |
| M37562  | 1898-15 | 2175143          | 1             | 80.88                    | 506.86                     | Yes               |
| M37563  | 1945-15 | 2174332          | 1             | 89.62                    | 407.79                     | Yes               |
| M37564  | 1946-15 | 2173715          | 1             | 140.09                   | 349.73                     | Yes               |
| M37565  | 1947-15 | 2174336          | 1             | 67.39                    | 434.52                     | Yes               |
| M37566  | 1956-15 | 2184360          | 1             | 87.51                    | 393.97                     | No                |
| M37567  | 2007-15 | 2175750          | 1             | 55.45                    | 935.85                     | Yes               |
| M37568  | 2014-15 | 2185943          | 1             | 103.56                   | 415.62                     | No                |
| M37569  | 2015-15 | 2174259          | 1             | 91.17                    | 385.67                     | Yes               |
| M37570  | 2023-15 | 2176087          | 1             | 118.92                   | 448.34                     | Yes               |
| M37571  | 2043-15 | 2173673          | 1             | 112.45                   | 421.15                     | No                |
| M37572  | 2081-15 | 2174241          | 1             | 80.19                    | 351.58                     | Yes               |
| M37573  | 2085-15 | 2186255          | 1             | 90.36                    | 446.50                     | No                |
| M37574  | 2137-15 | 2174196          | 1             | 99.14                    | 417.93                     | Yes               |
